# Supplementary material for: Marketing Public Schools: A Political Challenge.
Source: Royal Society of Chemistry journal article supplement (doi:10.1039/c6an00165c), 1985-01-01
Supplement: c6an00165c1.pdf [file c6an00165c1.pdf]

## Electronic Supplementary Information

*for*

### **A dual-mode signaling responses of AuNPs-fluorescein based probe for specific detection of thiourea**

Chuanxia Chen <sup>a,b</sup>, Dan Zhao <sup>a,b</sup>, Jian Sun <sup>a,\*</sup> and Xiurong Yang <sup>a,\*</sup>

<sup>a</sup> *State Key Laboratory of Electroanalytical Chemistry, Changchun Institute of Applied Chemistry, Chinese Academy of Sciences, Changchun, Jilin 130022, China*

<sup>b</sup> *University of Chinese Academy of Sciences, Beijing 100049, China*

---

\* Corresponding author. Tel.: +86 431 85262056; fax: +86 431 85689278.

*E-mail address:* [xryang@ciac.ac.cn](mailto:xryang@ciac.ac.cn)

**Table S1** Zeta potential measurement at pH 7.0

|                     | Fluorescein | AuNPs     | AuNPs+thiourea |
|---------------------|-------------|-----------|----------------|
| Zeta potential (mV) | 1.89 mV     | -14.10 mV | -4.39 mV       |

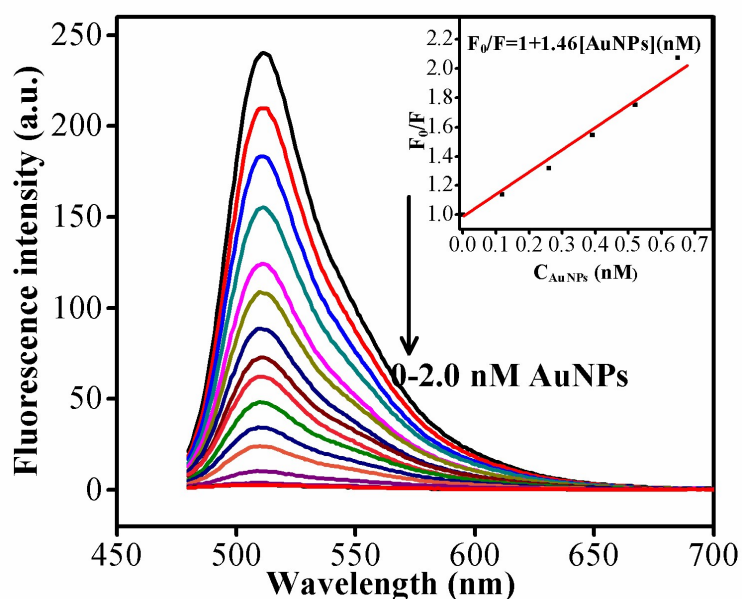

**Fig. S1.** Fluorescence emission spectra of fluorescein with successive concentrations of AuNPs (Arrow direction: 0, 0.13, 0.26, 0.39, 0.52, 0.65, 0.78, 0.91, 1.04, 1.17, 1.30, 1.43, 1.56, 1.69, 1.82, 2.0 nM). Insert was the corresponding relationship between  $F_0/F$  and AuNPs concentration in the range of 0-0.65 nM.

**Table S2** Quenching constants of different FRET systems

| Systems                       | Quenching constant ( $L \cdot nmol^{-1}$ ) | Reference |
|-------------------------------|--------------------------------------------|-----------|
| Fluorescein-AuNPs             | 1.46                                       | This work |
| MPBA-AuNPs                    | 0.8                                        | 1         |
| CDs-AuNPs                     | 0.535                                      | 2         |
| CdTe@SiO <sub>2</sub> - AuNPs | 2.43                                       | 3         |
| CdTe QDs-AuNPs                | 5.8                                        | 4         |
| RB-AuNPs                      | 4.74                                       | 5         |

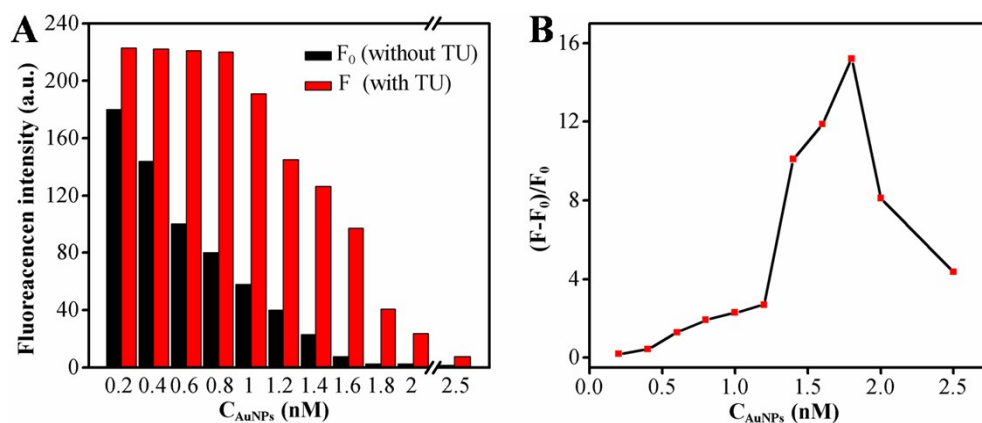

**Fig. S2.** (A) Fluorescence intensity of fluorescein with (F) and without thiourea ( $F_0$ ) in the presence of a series concentrations of AuNPs. (B) Fluorescence enhancement efficiency  $(F-F_0)/F_0$  as a function of various AuNPs concentration.

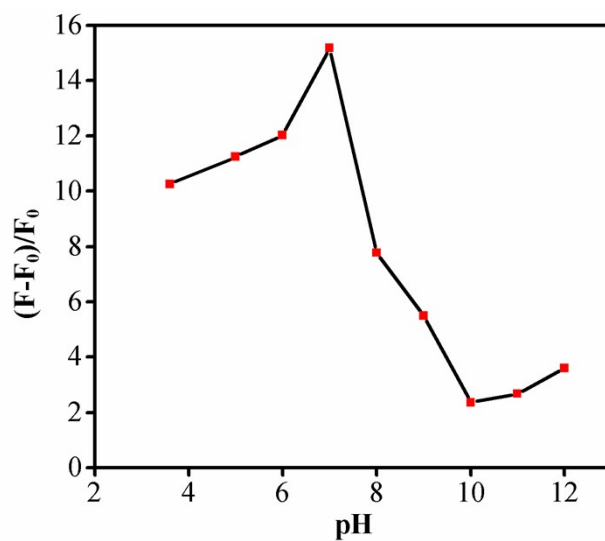

**Fig. S3.** The  $(F-F_0)/F_0$  as a function of various pH values.

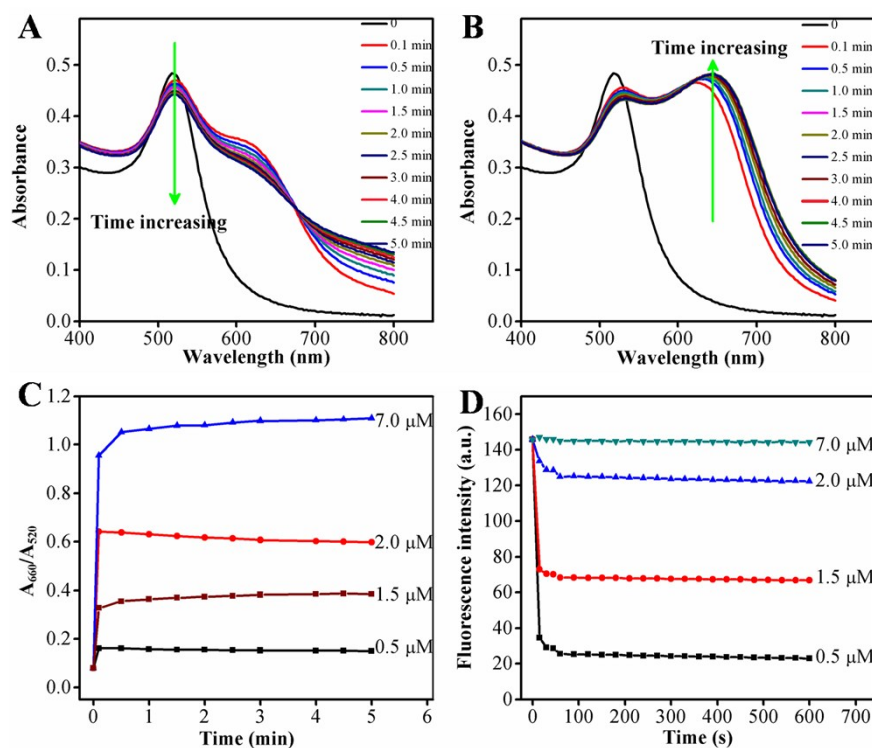

**Fig. S4.** (A) UV-vis spectra of the sensing system toward time (1.5  $\mu\text{M}$ ). (B) UV-vis spectra of the sensing system toward time (7.0  $\mu\text{M}$ ). (C) The  $A_{660}/A_{520}$  and (D)  $(F-F_0)/F_0$  against time in the presence of different concentrations of thiourea.

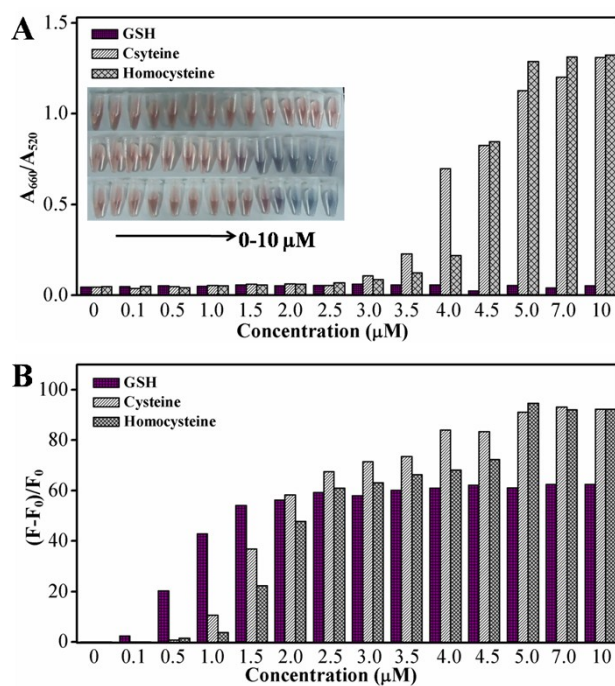

**Fig. S5.** (A) Colorimetric change and (B) fluorescence recovery of the sensing system in the presence of GSH, cysteine and homocysteine. Insert in A shows the photographs of the visual color change corresponding to 0-10  $\mu\text{M}$  GSH, cysteine and homocysteine.

## References

- 1 M. Xue, X. Wang, L. L. Duan, W. Gao, L. F. Ji and B. Tang, *Biosens. Bioelectron.*, 2012, **36**, 168-173.
- 2 D. Zhao, C. X. Chen, L. X. Lu, F. Yang and X. R. Yang, *Analyst*, 2015, **140**, 8157-8164.
- 3 F. Gao, Q. Ye, P. Cui and L. Zhang, *J. Agric. Food. Chem.*, 2012, **60**, 4550-4558.
- 4 B. Tang, L. Cao, K. Xu, L. Zhuo, J. Ge, Q. Li and L. Yu, *Chemistry-a European Journal*, 2008, **14**, 3637-3644.
- 5 X. Cao, F. Shen, M. Zhang, J. Guo, Y. L. Luo, J. Xu, Y. Li and C. Sun, *Dyes and Pigments*, 2014, **111**, 99-107.
